# Supplementary material
Source: PubMed Central journal article supplement (PMC5750088)
Supplement: NIHMS891496-supplement-8.pdf [file NIHMS891496-supplement-8.pdf]

**Supplementary Table 1. Thirty genes that are known to cause monogenic forms of NL/NC and that were included in this study.**

|    | Gene Symbol     | Gene Name                                                    | Accession #    | Disease entity                                                                                   | MIM-Phenotype # | Mode | Coding Exons | Reference |
|----|-----------------|--------------------------------------------------------------|----------------|--------------------------------------------------------------------------------------------------|-----------------|------|--------------|-----------|
| 1  | <b>AGXT</b>     | Alanine-glyoxylate aminotransferase                          | NM_000030.2    | Primary hyperoxaluria, type 1                                                                    | 259900          | AR   | 11           | 1         |
| 2  | <b>APRT</b>     | Adenine phosphoribosyltransferase                            | NM_000485.2    | Adenine phosphoribosyltransferase deficiency, Urolithiasis (DHA stones), renal failure           | 614723          | AR   | 5            | 2         |
| 3  | <b>ATP6V0A4</b> | ATPase, H+ transporting, lysosomal V0 subunit a4             | NM_020632.2    | dRTA                                                                                             | 602722          | AR   | 20           | 3         |
| 4  | <b>ATP6V1B1</b> | ATPase, H+ transporting, lysosomal 56/58kDa, V1 subunit B1   | NM_001692.3    | Distal renal tubular acidosis (dRTA) with deafness                                               | 267300          | AR   | 14           | 4         |
| 5  | <b>CA2</b>      | Carbonic anhydrase II                                        | NM_000067.2    | Osteopetrosis + d/pRTA                                                                           | 259730          | AR   | 7            | 5         |
| 6  | <b>CASR</b>     | Calcium-sensing receptor                                     | NM_001178065.1 | Hypocalcemia with Bartter syndrome / hypocalcemia, autosomal dominant                            | 601198          | AD   | 6            | 6         |
| 7  | <b>CLCN5</b>    | Chloride channel, voltage-sensitive 5                        | NM_001127898.3 | Dent disease / Nephrolithiasis, type 1                                                           | 300009 / 310468 | XR   | 14           | 7         |
| 8  | <b>CLCNKB</b>   | Chloride channel, voltage-sensitive Kb                       | NM_000085.4    | Bartter syndrome, type 3                                                                         | 607364          | AR   | 19           | 8         |
| 9  | <b>CLDN16</b>   | Claudin 16                                                   | NM_006580.3    | Familial hypomagnesemia with hypercalciuria & nephrocalcinosis (FHHNC)                           | 248250          | AR   | 5            | 9         |
| 10 | <b>CLDN19</b>   | Claudin 19                                                   | NM_001123395.1 | Familial hypomagnesemia with hypercalciuria & nephrocalcinosis (FHHNC) with ocular abnormalities | 248190          | AR   | 4            | 10        |
| 11 | <b>CYP24A1</b>  | Cytochrome P450, family 24, subfamily A, polypeptide 1       | NM_000782.4    | 1,25-(OH) vitamin D-24 hydroxylase deficiency, infantile hypercalcemia                           | 143880          | AR   | 11           | 11        |
| 12 | <b>FAM20A</b>   | Family with sequence similarity 20, member A                 | NM_017565.3    | Enamel-renal syndrome, amelogenesis imperfect and nephrocalcinosis                               | 204690          | AR   | 12           | 12        |
| 13 | <b>GRHPR</b>    | Glyoxylate reductase/hydroxypyruvate reductase               | NM_012203.1    | Primary hyperoxaluria, type 2                                                                    | 260000          | AR   | 9            | 13        |
| 14 | <b>HNF4A</b>    | Hepatocyte nuclear factor 4, alpha                           | NM_000457.4    | Mature onset diabetes of the young Fanconi syndrome + Nephrocalcinosis                           | 125850          | AD   | 1            | 14        |
| 15 | <b>HOGA1</b>    | 4-hydroxy-2-oxoglutarate aldolase 1                          | NM_138413.3    | Primary hyperoxaluria, type 3                                                                    | 613616          | AR   | 7            | 15        |
| 16 | <b>HPRT1</b>    | Hypoxanthine phosphoribosyltransferase 1                     | NM_000194.2    | Kelley-Seegmiller syndrome, partial HPRT deficiency, HPRT-related gout                           | 300323          | XR   | 9            | 16        |
| 17 | <b>KCNJ1</b>    | Potassium inwardly-rectifying channel, subfamily J, member 1 | NM_000220.4    | Bartter syndrome, type 2                                                                         | 241200          | AR   | 2            | 17        |
| 18 | <b>OCRL</b>     | Oculocerebrorenal syndrome of Lowe                           | NM_000276.3    | Lowe syndrome / Dent disease 2                                                                   | 309000 / 300555 | XR   | 24           | 18        |

|    |                 |                                                                                                                                                          |                |                                                                                           |                 |       |    |    |
|----|-----------------|----------------------------------------------------------------------------------------------------------------------------------------------------------|----------------|-------------------------------------------------------------------------------------------|-----------------|-------|----|----|
| 19 | <b>SLC12A1</b>  | Solute carrier family 12, member 1                                                                                                                       | NM_000338.2    | Bartter syndrome, type 1                                                                  | 601678          | AR    | 27 | 19 |
| 20 | <b>SLC22A12</b> | Solute carrier family 22 (organic anion/urate transporter), member 12                                                                                    | NM_144585.3    | Renal hypouricemia, RHUC1                                                                 | 220150          | AR/AD | 10 | 20 |
| 21 | <b>SLC26A1</b>  | Solute carrier family 26 (sulfate transporter), member 1                                                                                                 | NM_213613      | Nephrolithiasis, calcium oxalate                                                          | 167030          | AR    | 4  | 21 |
| 22 | <b>SLC2A9</b>   | Solute carrier family 2 (facilitated glucose transporter), member 9                                                                                      | NM_001001290.1 | Renal hypouricemia, RHUC2                                                                 | 612076          | AR/AD | 13 | 22 |
| 23 | <b>SLC34A1</b>  | Solute carrier family 34 (sodium phosphate), member 1                                                                                                    | NM_003052.4    | Hypophosphatemic nephrolithiasis/osteoporosis-1, NPHLOP1 / Fanconi renotubular syndrome 2 | 612286 / 613388 | AR/AD | 13 | 23 |
| 24 | <b>SLC34A3</b>  | Solute carrier family 34 (sodium phosphate), member 3                                                                                                    | NM_001177316.1 | Hypophosphatemic rickets with hypercalciuria                                              | 241530          | AR    | 12 | 24 |
| 25 | <b>SLC3A1</b>   | Solute carrier family 3 (cystine, dibasic and neutral amino acid transporters, activator of cystine, dibasic and neutral amino acid transport), member 1 | NM_000341.3    | Cystinuria, type A                                                                        | 220100          | AR    | 10 | 25 |
| 26 | <b>SLC4A1</b>   | Solute carrier family 4, anion exchanger, member 1 (erythrocyte membrane protein band 3, Diego blood group)                                              | NM_000342.3    | Primary distal renal tubular acidosis, dominant / recessive                               | 179800 / 611590 | AR/AD | 19 | 26 |
| 27 | <b>SLC7A9</b>   | Solute carrier family 7 (glycoprotein associated amino acid transporter light chain, bo,+ system), member 9                                              | NM_014270.4    | Cystinuria, type B                                                                        | 220100          | AR/AD | 12 | 27 |
| 28 | <b>SLC9A3R1</b> | Solute carrier family 9, subfamily A (NHE3, cation proton antiporter 3), member 3 regulator 1                                                            | NM_004252.4    | Hypophosphatemic nephrolithiasis/osteoporosis 2, (NPHLOP2)                                | 612287          | AD    | 6  | 28 |
| 29 | <b>VDR</b>      | Vitamin D (1,25-dihydroxyvitamin D3) receptor                                                                                                            | NM_000376.2    | Idiopathic hypercalciuria                                                                 | 277440          | AD    | 11 | 29 |
| 30 | <b>XDH</b>      | Xanthine dehydrogenase                                                                                                                                   | NM_000379.3    | Xanthinuria, type 1                                                                       | 278300          | AR    | 36 | 30 |

AD, autosomal dominant; AR, autosomal recessive.

#### REFERENCES

1. Purdue PE, Allsop J, Isaya G, Rosenberg LE, Danpure CJ. Mistargeting of peroxisomal L-alanine:glyoxylate aminotransferase to mitochondria in primary hyperoxaluria patients depends upon activation of a cryptic mitochondrial targeting sequence by a point mutation. *Proc Natl Acad Sci U S A*. Dec 1 1991;88(23):10900-10904.
2. Hidaka Y, Palella TD, O'Toole TE, Tarle SA, Kelley WN. Human adenine phosphoribosyltransferase. Identification of allelic mutations at the nucleotide level as a cause of complete deficiency of the enzyme. *J Clin Invest*. Nov 1987;80(5):1409-1415.
3. Smith AN, Skaug J, Choate KA, et al. Mutations in ATP6N1B, encoding a new kidney vacuolar proton pump 116-kD subunit, cause recessive distal renal tubular acidosis with preserved hearing. *Nat Genet*. Sep 2000;26(1):71-75.

4. Karet FE, Finberg KE, Nelson RD, et al. Mutations in the gene encoding B1 subunit of H<sup>+</sup>-ATPase cause renal tubular acidosis with sensorineural deafness. *Nat Genet.* Jan 1999;21(1):84-90.
5. Venta PJ, Welty RJ, Johnson TM, Sly WS, Tashian RE. Carbonic anhydrase II deficiency syndrome in a Belgian family is caused by a point mutation at an invariant histidine residue (107 His----Tyr): complete structure of the normal human CA II gene. *Am J Hum Genet.* Nov 1991;49(5):1082-1090.
6. Pearce SH, Williamson C, Kifor O, et al. A familial syndrome of hypocalcemia with hypercalciuria due to mutations in the calcium-sensing receptor. *N Engl J Med.* Oct 10 1996;335(15):1115-1122.
7. Lloyd SE, Pearce SH, Fisher SE, et al. A common molecular basis for three inherited kidney stone diseases. *Nature.* Feb 01 1996;379(6564):445-449.
8. Simon DB, Bindra RS, Mansfield TA, et al. Mutations in the chloride channel gene, CLCNKB, cause Bartter's syndrome type III. *Nat Genet.* Oct 1997;17(2):171-178.
9. Simon DB, Lu Y, Choate KA, et al. Paracellin-1, a renal tight junction protein required for paracellular Mg<sup>2+</sup> resorption. *Science.* Jul 2 1999;285(5424):103-106.
10. Konrad M, Schaller A, Seelow D, et al. Mutations in the tight-junction gene claudin 19 (CLDN19) are associated with renal magnesium wasting, renal failure, and severe ocular involvement. *Am J Hum Genet.* Nov 2006;79(5):949-957.
11. Schlingmann KP, Kaufmann M, Weber S, et al. Mutations in CYP24A1 and idiopathic infantile hypercalcemia. *N Engl J Med.* Aug 4 2011;365(5):410-421.
12. Jaureguiberry G, De la Dure-Molla M, Parry D, et al. Nephrocalcinosis (enamel renal syndrome) caused by autosomal recessive FAM20A mutations. *Nephron Physiol.* 2012;122(1-2):1-6.
13. Cramer SD, Ferree PM, Lin K, Milliner DS, Holmes RP. The gene encoding hydroxypyruvate reductase (GRHPR) is mutated in patients with primary hyperoxaluria type II. *Hum Mol Genet.* Oct 1999;8(11):2063-2069.
14. Hamilton AJ, Bingham C, McDonald TJ, et al. The HNF4A R76W mutation causes atypical dominant Fanconi syndrome in addition to a beta cell phenotype. *J Med Genet.* Mar 2014;51(3):165-169.
15. Belostotsky R, Seboun E, Idelson GH, et al. Mutations in DHDPSL are responsible for primary hyperoxaluria type III. *Am J Hum Genet.* Sep 10 2010;87(3):392-399.
16. Davidson BL, Tarle SA, Van Antwerp M, et al. Identification of 17 independent mutations responsible for human hypoxanthine-guanine phosphoribosyltransferase (HPRT) deficiency. *Am J Hum Genet.* May 1991;48(5):951-958.
17. Simon DB, Karet FE, Rodriguez-Soriano J, et al. Genetic heterogeneity of Bartter's syndrome revealed by mutations in the K<sup>+</sup> channel, ROMK. *Nat Genet.* Oct 1996;14(2):152-156.
18. Reilly DS, Lewis RA, Ledbetter DH, Nussbaum RL. Tightly linked flanking markers for the Lowe oculocerebrorenal syndrome, with application to carrier assessment. *Am J Hum Genet.* May 1988;42(5):748-755.
19. Simon DB, Karet FE, Hamdan JM, DiPietro A, Sanjad SA, Lifton RP. Bartter's syndrome, hypokalaemic alkalosis with hypercalciuria, is caused by mutations in the Na-K-2Cl cotransporter NKCC2. *Nat Genet.* Jun 1996;13(2):183-188.
20. Enomoto A, Kimura H, Chairoungdua A, et al. Molecular identification of a renal urate anion exchanger that regulates blood urate levels. *Nature.* May 23 2002;417(6887):447-452.
21. Gee HY, Jun I, Braun DA, et al. Mutations in SLC26A1 Cause Nephrolithiasis. *Am J Hum Genet.* Jun 02 2016;98(6):1228-1234.
22. Matsuo H, Chiba T, Nagamori S, et al. Mutations in glucose transporter 9 gene SLC2A9 cause renal hypouricemia. *Am J Hum Genet.* Dec 2008;83(6):744-751.
23. Prie D, Huart V, Bakouh N, et al. Nephrolithiasis and osteoporosis associated with hypophosphatemia caused by mutations in the type 2a sodium-phosphate cotransporter. *N Engl J Med.* Sep 26 2002;347(13):983-991.
24. Lorenz-Depiereux B, Benet-Pages A, Eckstein G, et al. Hereditary hypophosphatemic rickets with hypercalciuria is caused by mutations in the sodium-phosphate cotransporter gene SLC34A3. *Am J Hum Genet.* Feb 2006;78(2):193-201.

25. Calonge MJ, Gasparini P, Chillaron J, et al. Cystinuria caused by mutations in rBAT, a gene involved in the transport of cystine. *Nat Genet.* Apr 1994;6(4):420-425.
26. Bruce LJ, Cope DL, Jones GK, et al. Familial distal renal tubular acidosis is associated with mutations in the red cell anion exchanger (Band 3, AE1) gene. *J Clin Invest.* Oct 1 1997;100(7):1693-1707.
27. Feliubadalo L, Font M, Purroy J, et al. Non-type I cystinuria caused by mutations in SLC7A9, encoding a subunit (bo,+AT) of rBAT. *Nat Genet.* Sep 1999;23(1):52-57.
28. Karim Z, Gerard B, Bakouh N, et al. NHERF1 mutations and responsiveness of renal parathyroid hormone. *N Engl J Med.* Sep 11 2008;359(11):1128-1135.
29. Scott P, Ouimet D, Valiquette L, et al. Suggestive evidence for a susceptibility gene near the vitamin D receptor locus in idiopathic calcium stone formation. *J Am Soc Nephrol.* May 1999;10(5):1007-1013.
30. Ichida K, Amaya Y, Kamatani N, Nishino T, Hosoya T, Sakai O. Identification of two mutations in human xanthine dehydrogenase gene responsible for classical type I xanthinuria. *J Clin Invest.* May 15 1997;99(10):2391-2397.
